# Supplementary material for: Quantum dot probes for bacteria distinguish Escherichia coli mutants and permit in vivo imaging
Source: Royal Society of Chemistry journal article supplement (doi:10.1039/b803590c), 2008-01-01
Supplement: b803590c.pdf [file b803590c.pdf]

Supporting information for:

## Quantum Dot Probes for Bacteria Distinguish *Escherichia coli* Mutants and Permit In Vivo Imaging

W. Matthew Leevy, Timothy N. Lambert, James R. Johnson, Joshua Morris, and Bradley D. Smith\*

\* phone: +1-574-6318632, email: smith.115@nd.edu

**Cell Labeling:** Compound **1** (4  $\mu\text{M}$ ) was incubated in TES buffer (5 mM TES, 145 mM NaCl, pH = 7.4) for 10 minutes with either streptavidin-coated **GQD** (Qdot<sup>®</sup> 565 Streptavidin Conjugate, em:565 nm, Invitrogen, Q10101MP) or streptavidin-coated **RQD** (Qdot<sup>®</sup> 655 Streptavidin Conjugate, em: 665 nm, Invitrogen, Q10121MP) or streptavidin-coated **NIRQD** (Qdot<sup>®</sup> 800 Streptavidin Conjugate, em: 800 nm, Invitrogen, MP10171MP). The pellet resulting from centrifugation of 0.5 mL of bacteria (OD = 0.5) was resuspended in 50  $\mu\text{L}$  of TES buffer and treated with **1-QDG** or **1-RQD**. After 10 minutes, the labeled cells were washed twice (centrifugation and resuspension in 100  $\mu\text{L}$  TES buffer) then imaged. In the case of **1-NIRQD**, a 100  $\mu\text{L}$  solution of **NIRQD** (160 nM) and **1** (640 nM) was sterile filtered (0.2  $\mu\text{m}$  pore size) and added to a pellet from 1 mL of *E. coli* K12 (OD = 1). After 10 minutes, the labeled cells were washed twice (centrifugation and resuspension in 50  $\mu\text{L}$  TES buffer) and used for in vivo imaging.

**Microscopy:** Images were acquired on a Nikon Eclipse TE2000-U epifluorescence microscope using a 100X objective, 10X ocular and 1.5X optivar to obtain images at 1500X. **1-GQD** was imaged using a “green” filter set (Exciter: D480/30X, Dichroic: 400DCLP, Emitter: HQ535/50m), **1-RQD** was imaged using a “red” filter set (Exciter: HQ545/30x, Dichroic: Q570LP, Emitter: HQ610/75m) **1-NIRQD** was imaged using a “near infrared” filter set (Exciter HQ710/75x, Dichroic Q750LP, Emitter HQ810/90m).

**In Vivo Imaging:** A nude mouse (strain nu/nu, Taconic Inc.) was anesthetized under isoflurane and a 50  $\mu\text{L}$  suspension of **1-NIRQD** bound to *E. coli* JM83 cells was injected in the left rear leg muscle. After 5 minutes, a 16-bit fluorescence image of the mouse was obtained using an IVIS Lumina in vivo imaging station, with the Cy 5.5 exciter (635  $\pm$  20 nm) and ICG (840  $\pm$  30 nm) emitter using a 10 s acquisition time, Fstop =1, and low binning (2x2). The image was then background subtracted and set to a “Fire” fluorescence intensity scale using the ImageJ v1.37 software suite available for free download at the NIH website <http://rsb.info.nih.gov/ij/>.

**QD Photophysics:** The Figure below was taken from the Invitrogen web-site at [www.invitrogen.com](http://www.invitrogen.com).

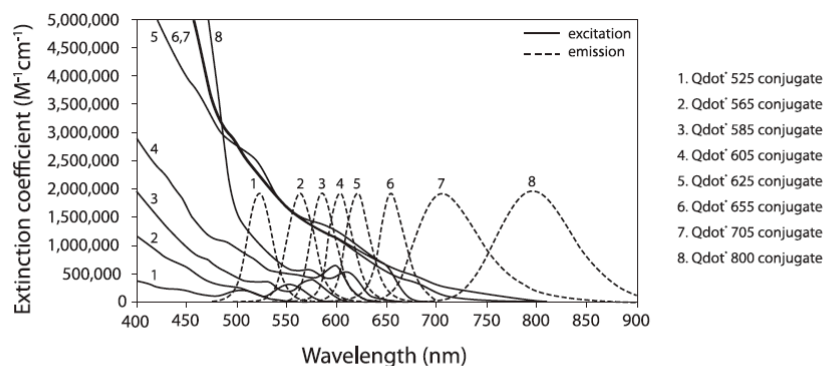

**Figure 3.** Typical absorption and emission spectra of Qdot<sup>®</sup> 525 streptavidin conjugate (1), Qdot<sup>®</sup> 565 streptavidin conjugate (2), Qdot<sup>®</sup> 585 streptavidin conjugate (3), Qdot<sup>®</sup> 605 streptavidin conjugate (4), Qdot<sup>®</sup> 625 streptavidin conjugate (5), Qdot<sup>®</sup> 655 streptavidin conjugate (6), Qdot<sup>®</sup> 705 streptavidin conjugate (7), Qdot<sup>®</sup> 800 streptavidin conjugate (8).
